# Supplementary material for: A three-dimensional hierarchical TiO2urchin as a photoelectrochemical anode with omnidirectional anti-reflectance properties
Source: Royal Society of Chemistry journal article supplement (doi:10.1039/c4cp03043e), 2014-09-12
Supplement: c4cp03043e1.pdf [file c4cp03043e1.pdf]

## Electronic supplementary information

### Three-dimensional hierarchical TiO<sub>2</sub> urchin as photoelectrochemical anode with omnidirectional anti-reflectance properties

Weina Ren<sup>1</sup>, Haifeng Zhang<sup>1</sup>, Dezhi Kong<sup>1</sup>, Bo Liu<sup>1</sup>, Yaping Yang<sup>1</sup>, Chuanwei Cheng<sup>1,2\*</sup>

<sup>1</sup>MOE Key Laboratory of Advanced Micro-structured Materials, School of Physics Science and Engineering, Tongji University, Shanghai 200092, P.R. China

<sup>2</sup>National Laboratory for Infrared Physics, Shanghai Institute of Technical Physics, Chinese Academy of Sciences, Shanghai 200083, P. R. China

E-mail: cwcheng@tongji.edu.cn

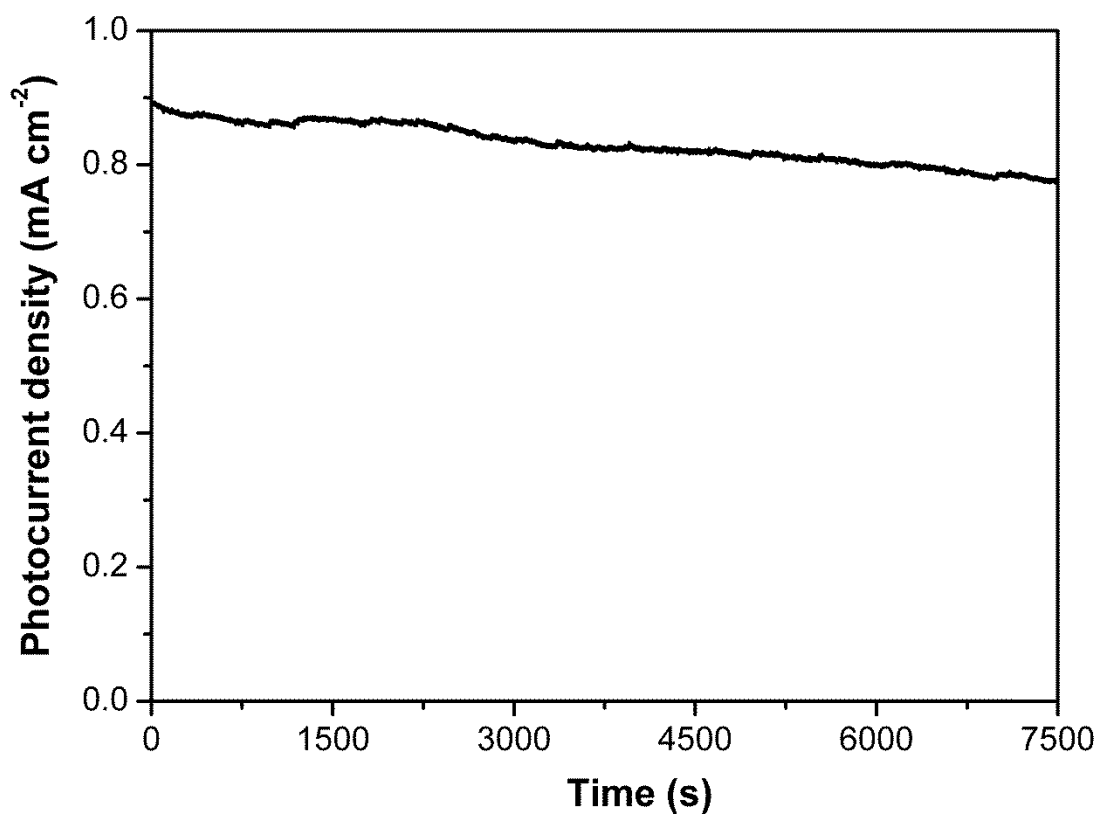

Figure S1 Long-term stability of TiO<sub>2</sub> urchin photoanode under continuous light illumination

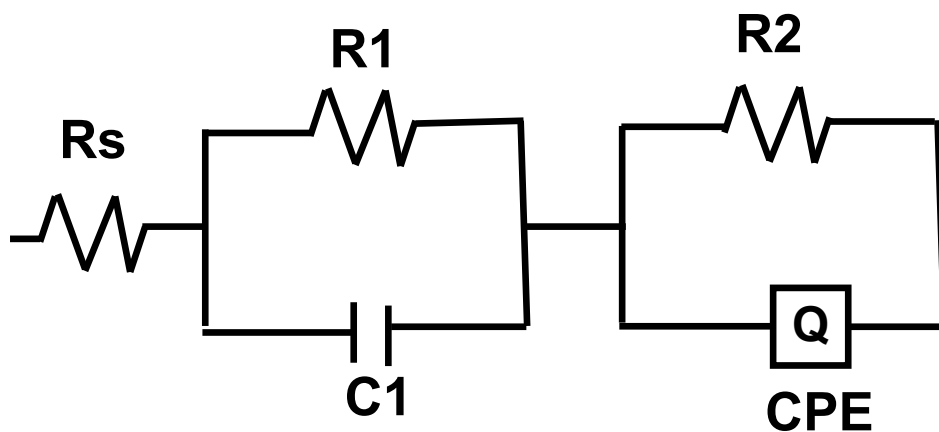

Figure S2 Equivalent circuits used to fit the EIS response of the TiO<sub>2</sub> urchin and microspheres photoanodes under illumination.

R<sub>s</sub> working medium resistance

R<sub>1</sub> charge transfer resistance between TiO<sub>2</sub>/FTO interface.

C<sub>1</sub> TiO<sub>2</sub> capacitance, including surface state and Helmholtze double layer

R<sub>2</sub> charge tranfer resistance between TiO<sub>2</sub>/electrolyte interface

CPE contant phase element defined by CPE.

Table 1 Parameters of the Equivalent—Circuit components that are used to model the TiO<sub>2</sub> microspheres and TiO<sub>2</sub> urchin electrodes.

| Parameters                    | R <sub>s</sub> | C <sub>1</sub>           | R <sub>1</sub> | CPE                  | R <sub>2</sub> |
|-------------------------------|----------------|--------------------------|----------------|----------------------|----------------|
| TiO <sub>2</sub> microspheres | 20.59 Ω        | 0.14 mF cm <sup>-2</sup> | 2139 Ω         | 0.001507             | 1109 Ω         |
| TiO <sub>2</sub> urchin       | 20.87 Ω        | 0.76 mF cm <sup>-2</sup> | 16.14 Ω        | 7.002E <sup>-9</sup> | 49.7 Ω         |
| Errors (microspheres)         | 5.53%          | 3.49%                    | 4.68%          | 14.37%               | 3.92%          |
| Errors (urchin)               | 6.53%          | 3.09%                    | 5.61%          | 10%                  | 3.63%          |
